# Supplementary material for: An aqueous rechargeable copper ammonium hybrid battery with good cycling performance
Source: Royal Society of Chemistry journal article supplement (doi:10.1039/d3qi02424e), 2024-01-01
Supplement: d3qi02424e1.pdf [file d3qi02424e1.pdf]

## Supplementary Information

An Aqueous Rechargeable Copper Ammonium Hybrid Battery with Good  
Cycling Performance

Wenhui Yang<sup>1</sup>, Xikun Zhang<sup>1</sup>, Guangchang Shu, Bowei Xia, Haoxiang Yu,  
Liyuan Zhang, Lei Yan\*, Jie Shu\*

School of Materials Science and Chemical Engineering, Ningbo University, Ningbo,  
Zhejiang, 315211, China

## Experimental section

### Materials

$\text{K}_4\text{Fe}(\text{CN})_6 \cdot 3\text{H}_2\text{O}$  (analytical reagent, 99.0%), anhydrous  $\text{CuSO}_4$  (analytical reagent, 99.0%) and polyvinylpyrrolidone (PVP10, K29-32) were purchased from Macklin.  $\text{KCl}$  (guaranteed reagent,  $\geq 99.8\%$ ),  $(\text{NH}_4)_2\text{SO}_4$  (analytical reagent,  $\geq 99.0\%$ ) and  $\text{Cu}(\text{NO}_3)_2 \cdot 3\text{H}_2\text{O}$  (analytical reagent, 99.0-102.0%) were purchased from Sinopharm. None of the chemicals were further purified before usage.

### Preparation of N-CuHCF

In this research, a viable two-step synthesis was adopted to fabricate  $\text{NH}_4^+$ -rich copper hexacyanohydroferrate (N-CuHCF). In the first step,  $\text{K}_2\text{Cu}[\text{Fe}(\text{CN})_6]$  was typically prepared via co-precipitation. Initially, 2.1123 g  $\text{K}_4\text{Fe}(\text{CN})_6 \cdot 3\text{H}_2\text{O}$  was dissolved in 50 mL deionized (DI) water, labeled solution A. Subsequently, 0.8775 g anhydrous  $\text{CuSO}_4$ , 3.7276 g  $\text{KCl}$ , and 4.0005 g PVP10 were mixed with 50 mL DI water, stirring until clear solution B was afforded. Afterwards, solution A was added dropwise into solution B under magnetic stirring. After 6 h of reaction, the resulting russet precipitate was collected by centrifugation and washed with DI water and ethanol several times, and then dried in vacuum at 80 °C overnight to obtain  $\text{K}_2\text{Cu}[\text{Fe}(\text{CN})_6]$ . The second step was to prepare  $(\text{NH}_4)_2\text{Cu}[\text{Fe}(\text{CN})_6]$  by utilizing ion-exchange method. Firstly, 0.1769 g  $\text{K}_2\text{Cu}[\text{Fe}(\text{CN})_6]$  was added into 50 mL DI water and ultrasonically dispersed for 20 min, labeled solution C. Following that, 1.3210 g  $(\text{NH}_4)_2\text{SO}_4$  was solubilized in 50 mL DI water to form solution D. Eventually, solution C was added dropwise into solution D under magnetic stirring and kermesinus precipitate extracted immediately. The mixture was stirred 6 h, and the precipitate was collected by centrifugation, washed repeatedly with DI water and ethanol, and then vacuum-dried at 80 °C overnight to obtain  $(\text{NH}_4)_2\text{Cu}[\text{Fe}(\text{CN})_6]$ .

### Preparation of electrolyte

Under magnetic stirring, 6.6072 g  $(\text{NH}_4)_2\text{SO}_4$  and 1.2081 g  $\text{Cu}(\text{NO}_3)_2$  were dissolved in 50 mL DI water to obtain homogeneous solution of 1 M  $(\text{NH}_4)_2\text{SO}_4$  and 0.1 M  $\text{Cu}(\text{NO}_3)_2$ , in which 0.1 M  $\text{Cu}(\text{NO}_3)_2$  was served as additive of electrolyte.

## **Material characterization**

The crystal structure of obtained N-CuHCF sample was investigated by X-ray diffraction (XRD, Bruker D8 Advance) using Cu-K $\alpha$  radiation ( $\lambda = 0.154$  nm) at 40 kV and 40 mA with  $2\theta$  range of 10 to 80°. The morphology of composite was observed by scanning electron microscopy (SEM, JEOL JSM-6390) and transmission electron microscopy (TEM, Tecnai G2 F20 S-Twin). The thermogravimetric analysis (TGA, PerkinElmer TGA 7) data were collected under N<sub>2</sub> flow at a ramp-up rate of 5 °C min<sup>-1</sup> from 25-600 °C. To determine the chemical state and composition of the cathode material, X-ray photoelectron spectroscopy (XPS) was carried out on PerkinElmer PHI 550. Fourier transform infrared (FTIR) spectra were measured by NICOLET 6700 in the range of 1000-4000 cm<sup>-1</sup> via KBr disk method.

## **Electrochemical measurements**

The N-CuHCF working electrode was prepared by mixing in a mass ratio of 60% N-CuHCF, 30% acetylene black and 10% polytetrafluoroethylene (PTFE, Macklin) to obtain a homogeneous slurry, which was coated on carbon paper current collectors and then dried in vacuum at 60 °C overnight. Each carbon paper was loaded with at least 2 mg cm<sup>-2</sup> of active material. Three-electrode cell and full cell were assembled for electrochemical measurements. The three-electrode cell contained 1 M (NH<sub>4</sub>)<sub>2</sub>SO<sub>4</sub> per 0.1 M Cu(NO<sub>3</sub>)<sub>2</sub> electrolyte, a N-CuHCF working electrode, a Pt counter electrode and a Ag/AgCl reference electrode ( $E = 0.1989$  V vs. normal hydrogen electrode, NHE) while the full cell used 1 M (NH<sub>4</sub>)<sub>2</sub>SO<sub>4</sub> and 0.1 M Cu(NO<sub>3</sub>)<sub>2</sub> homogeneous solution as electrolyte, N-CuHCF on a carbon paper as cathode and a copper sheet (20×15 mm) as anode. Cyclic voltammetry (CV) tests were carried out by BioLogic VSP electrochemical workstation from 0.5 to 1 V at various scan rates of 0.1 mV s<sup>-1</sup>, 0.2 mV s<sup>-1</sup>, 0.3 mV s<sup>-1</sup>, 0.4 mV s<sup>-1</sup> and 0.5 mV s<sup>-1</sup>. The cycling and rate performance were conducted within 0.5-1 V using a multichannel LANHE, CT2001A battery test instrument. The specific capacity of Cu-(N-CuHCF) battery was based on the active material mass of working electrode.



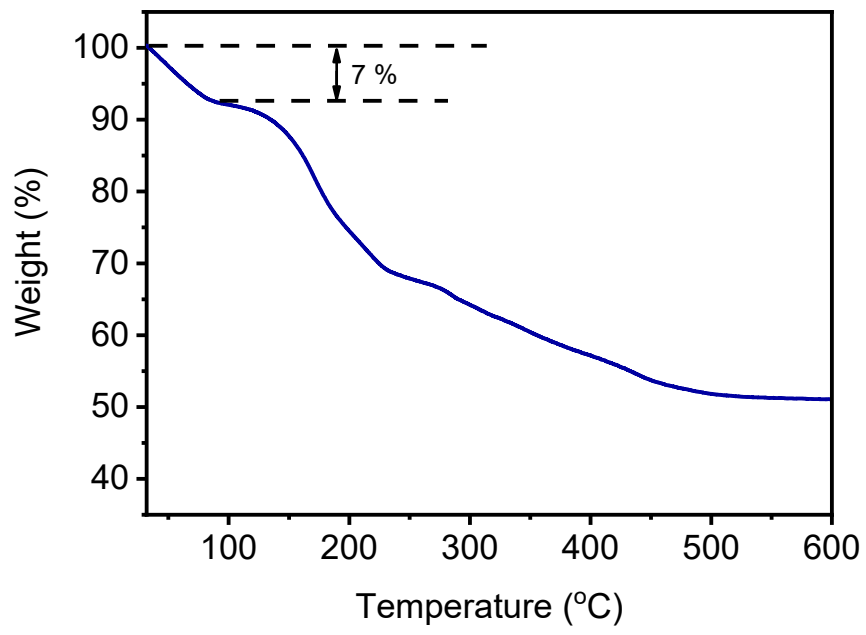

**Figure S1** TG curve of N-CuHCF.

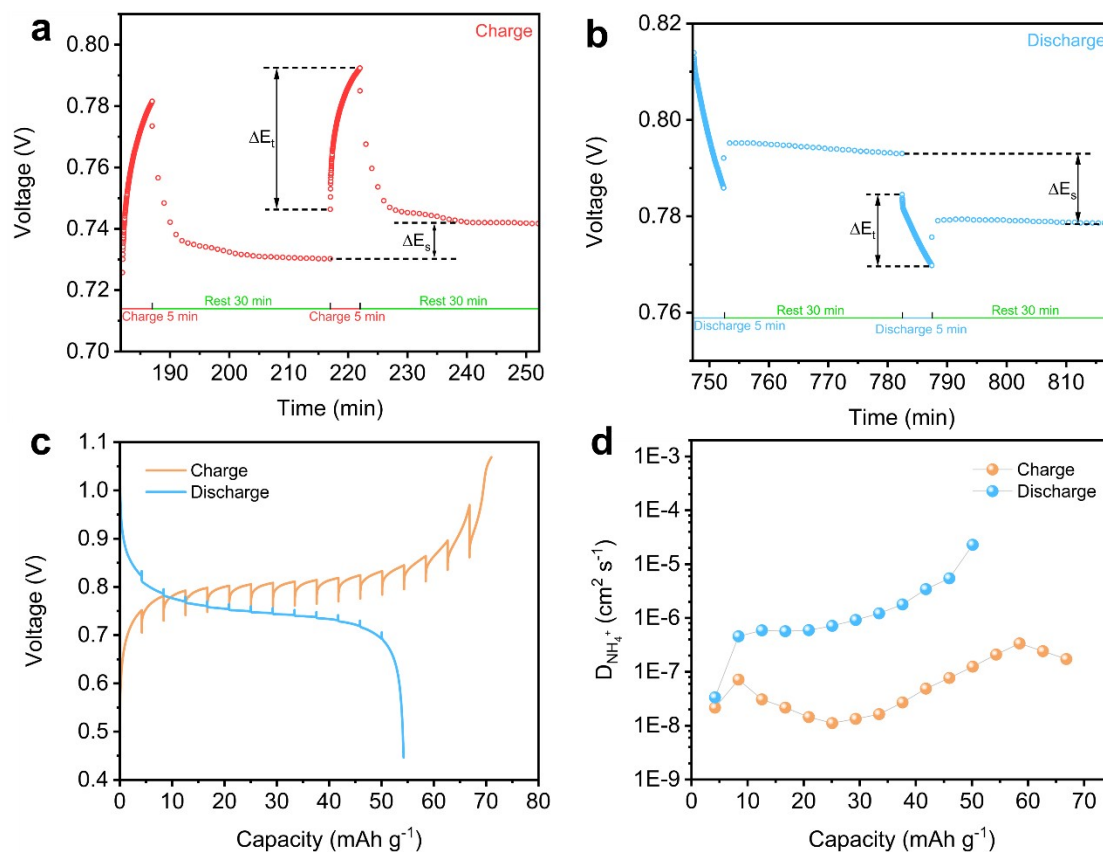

**Figure S2.** (a, b) Schematic illustration for selected steps of the GITT curves of Cu/N-CuHCF full battery during charge/discharge process. (c) Charge/discharge GITT curves for the N-CuHCF electrode at 0.2 A g<sup>-1</sup>. (d) The NH<sub>4</sub><sup>+</sup> diffusion coefficient calculated from GITT.

The Galvanostatic Intermittent Titration Technique (GITT) measurements are performed at the first discharge-charge curves at 0.2 A g<sup>-1</sup>. Subsequently, a galvanostatic pulse (charge or discharge) for 5 min and then rest for 30 min to reach the voltage equilibrium until 1.0 V (0.5 V). The NH<sub>4</sub><sup>+</sup> ion diffusion coefficients can be calculated based on the following formula:

$$D_{NH_4^+} = \frac{4}{\pi\tau} \left( \frac{m_B V_M}{M_B A} \right)^2 \left( \frac{\Delta E_s}{\Delta E_\tau} \right)^2$$

where  $\tau$  is the duration time of current pulse,  $m_B$ ,  $M_B$  and  $V_M$  correspond to the mass of the active material (g), molecular weight (g mol<sup>-1</sup>) and molar volume (cm<sup>3</sup> mol<sup>-1</sup>), respectively.  $A$  represents the total contacting area between electrode and electrolyte (cm<sup>2</sup>).  $\Delta E_\tau$  is the voltage change in the over cell voltage upon each current pulse, while  $\Delta E_s$  is the voltage change about steady state voltage between two adjacent steps.

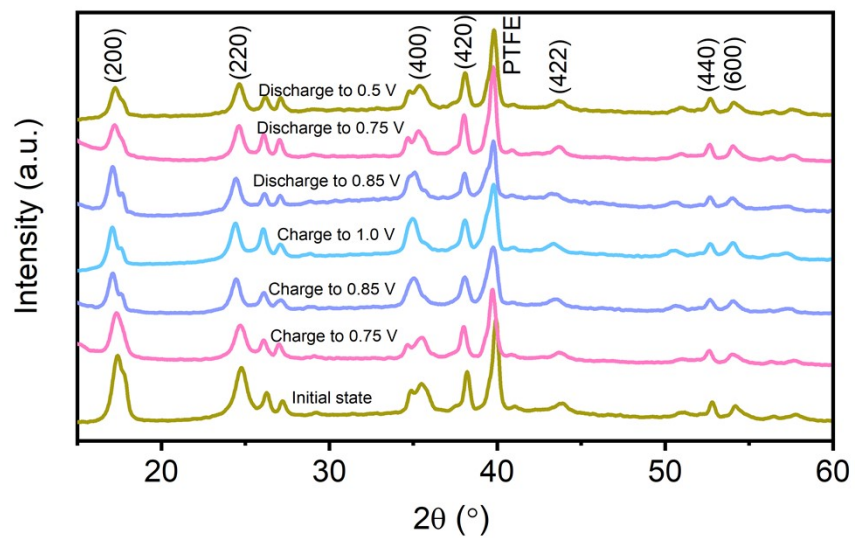

**Figure S3.** XRD patterns of N-CuHCF collected at different charge/discharge states.

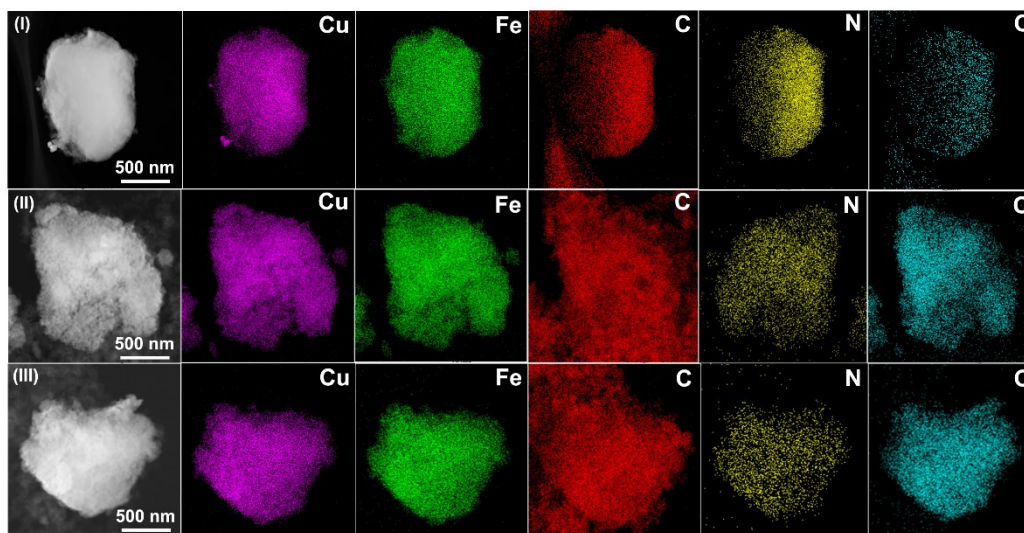

**Figure S4.** EDS mapping of elemental distributions (Cu, Fe, C, N, O) on N-CuHCF electrode: (I) pristine, (II) discharged and (III) charged states.



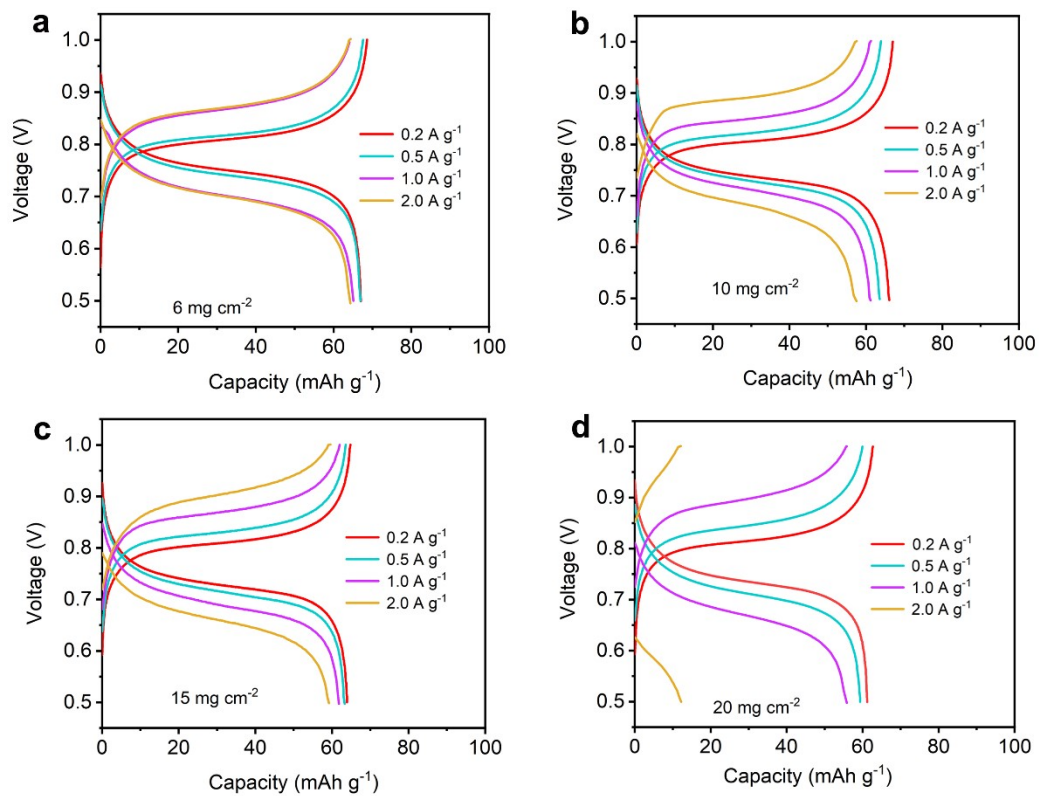

**Figure S5.** Rate performances of Cu//N-CuHCF cells with various mass-loadings (from 6 mg cm<sup>-2</sup> to 20 mg cm<sup>-2</sup>) in N-CuHCF cathode.

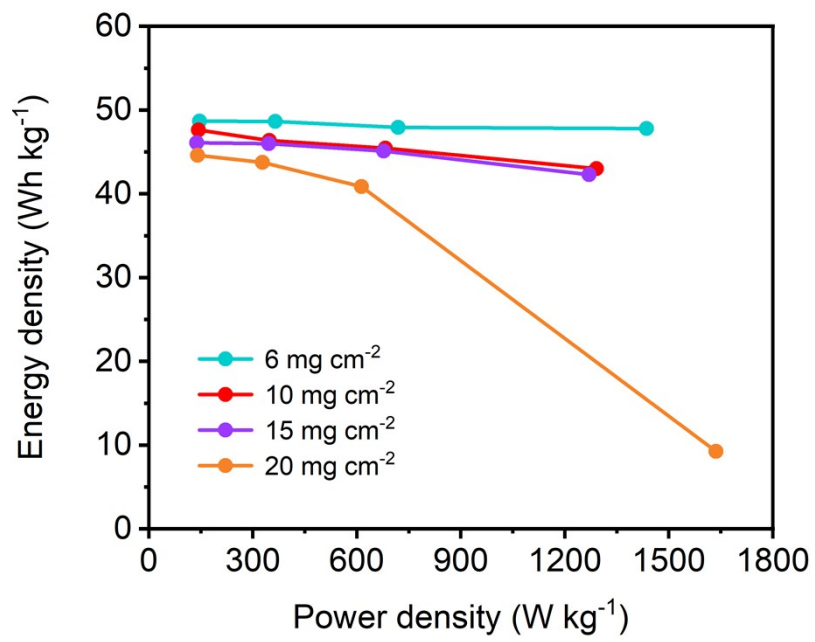

**Figure S6.** Ragone plot with different mass-loadings.

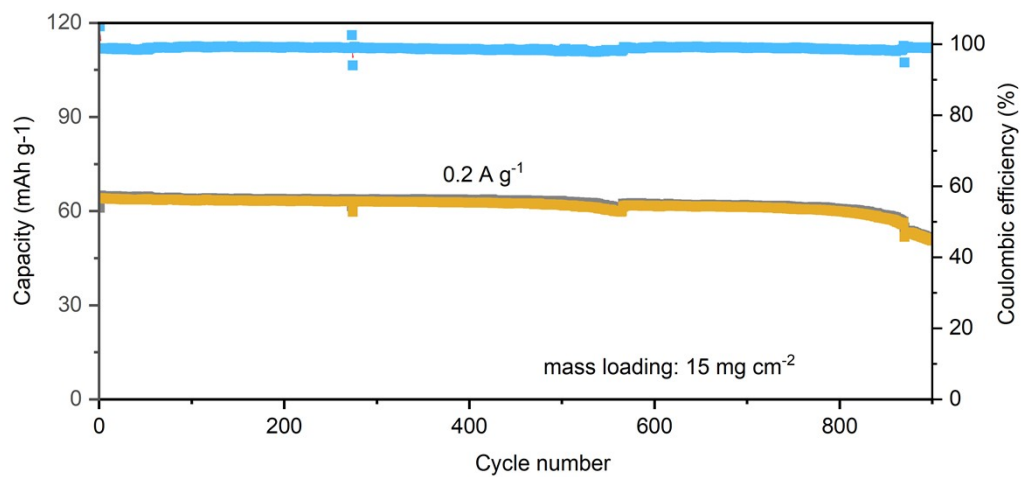

**Figure S7.** Cycle performance of the Cu//N-CuHCF battery with mass-loading of 15 mg cm<sup>-2</sup>.

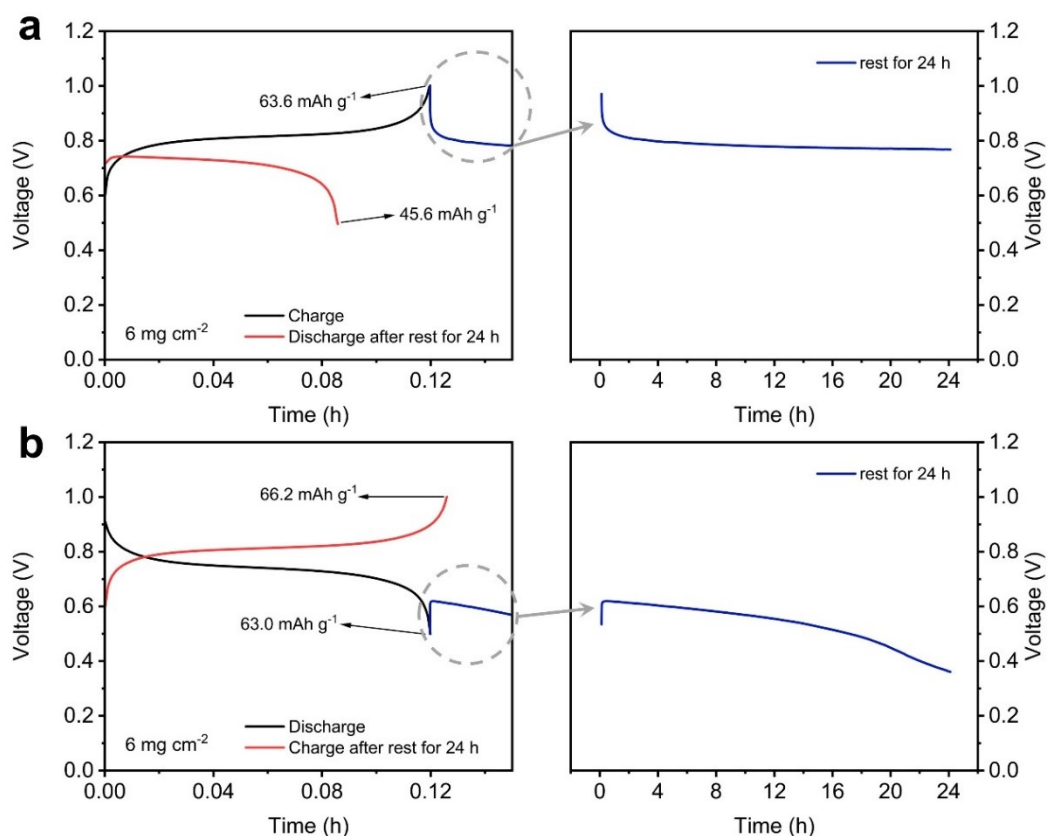

**Figure S8.** Self-discharge behavior tested at a current density of  $0.5 \text{ A g}^{-1}$ . (a) when firstly charged to 1.0 V, and then discharged to 0.5 V after rest for 24 hours. (b) when firstly discharged to 0.5 V, and then charged to 1.0 V after rest for 24 hours.

Firstly, we investigated the self-discharge at fully charged condition. In this test, the cell was fully charged to 1.0 V at  $0.5 \text{ A g}^{-1}$  followed by a rest step of 24 h, which was then discharged to 0.5 V at the same current. The discharge after rest delivers a capacity of  $45.6 \text{ mAh g}^{-1}$ , which is  $\sim 72 \%$  of that ( $63.6 \text{ mAh g}^{-1}$ ) on charge (**Figure S8a**). The state-of-charge test was also investigated with the similar process. After discharged to 0.5 V, the cell experienced a 24 h rest. The consequent recharge shows a capacity of  $66.2 \text{ mAh g}^{-1}$ , which is slightly higher than that ( $63 \text{ mAh g}^{-1}$ ) on discharge (**Figure S8b**). This phenomenon may be caused by the self-discharge of N-CuHCF electrode.
